# Supplementary material for: Viruses Infecting the Plant Pathogenic Fungus Rhizoctonia solani
Source: PubMed Central journal article supplement (PMC6950361; doi:10.3390/v11121113), 2019-11-30
Supplement: viruses-11-01113-s001.pdf [file viruses-11-01113-s001.pdf]

**Table S1:** Additional partial mycoviruses reported to infect *R. solani* following NGS.

| Name (abbr.)                                 | Classification (family) | Segment(s) | Genome size (bp/nt) | Closest match (BLAST)                                      | Similarity (%) | Accession Number |
|----------------------------------------------|-------------------------|------------|---------------------|------------------------------------------------------------|----------------|------------------|
| Rhizoctonia solani mitovirus 1               | <i>Narnaviridae</i>     | (+)ssRNA   | 2,462               | Botrytis cinerea debilitation-related virus                | 35             | KP900905         |
| Rhizoctonia solani mitovirus 2               | <i>Narnaviridae</i>     | (+)ssRNA   | 2,865               | Cryphonectria parasitica mitovirus 1                       | 39             | KP900911         |
| Rhizoctonia solani mitovirus 3               | <i>Narnaviridae</i>     | (+)ssRNA   | 2,924               | Tuber aestivum mitovirus                                   | 34             | KP900912         |
| Rhizoctonia solani mitovirus 4               | <i>Narnaviridae</i>     | (+)ssRNA   | 2,605               | Botrytis cinerea debilitation-related virus                | 36             | KP900913         |
| Rhizoctonia solani mitovirus 5               | <i>Narnaviridae</i>     | (+)ssRNA   | 2,357               | Tuber aestivum mitovirus 37                                | 37             | KP900914         |
| Rhizoctonia solani mitovirus 6               | <i>Narnaviridae</i>     | (+)ssRNA   | 2,615               | Ophiostoma mitovirus 6                                     | 37             | KP900915         |
| Rhizoctonia solani mitovirus 7               | <i>Narnaviridae</i>     | (+)ssRNA   | 3,085               | Cryphonectria parasitica mitovirus 1                       | 35             | KP900916         |
| Rhizoctonia solani mitovirus 8               | <i>Narnaviridae</i>     | (+)ssRNA   | 3225                | Cryphonectria parasitica mitovirus 1                       | 33             | KP900917         |
| Rhizoctonia solani mitovirus 9               | <i>Narnaviridae</i>     | (+)ssRNA   | 2,273               | Clitocybe odora virus                                      | 37             | KP900918         |
| Rhizoctonia solani mitovirus 10              | <i>Narnaviridae</i>     | (+)ssRNA   | 2,701               | Sclerotinia sclerotiorum mitovirus 1                       | 33             | KP900896         |
| Rhizoctonia solani mitovirus 11              | <i>Narnaviridae</i>     | (+)ssRNA   | 3,283               | Cryphonectria parasitica mitovirus 1                       | 35             | KP900906         |
| Rhizoctonia solani mitovirus 12              | <i>Narnaviridae</i>     | (+)ssRNA   | 3,378               | Clitocybe odora virus                                      | 31             | KP900907         |
| Rhizoctonia solani mitovirus 13              | <i>Narnaviridae</i>     | (+)ssRNA   | 3,039               | Clitocybe odora virus                                      | 31             | KP900908         |
| Rhizoctonia solani mitovirus 14              | <i>Narnaviridae</i>     | (+)ssRNA   | 3,219               | Clitocybe odora virus                                      | 46             | KP900909         |
| Rhizoctonia solani mitovirus 15              | <i>Narnaviridae</i>     | (+)ssRNA   | 3,901               | Clitocybe odora virus                                      | 38             | KP900910         |
| Rhizoctonia solani mitovirus 9 DC17 (RsMV-9) | <i>Narnaviridae</i>     | (+)ssRNA   | 672                 | Macrophomina phaseolina mitovirus 3                        | 100            | KX349058         |
| Rhizoctonia solani mitovirus 16 (RsMV-16)    | <i>Narnaviridae</i>     | (+)ssRNA   | 687                 | Macrophomina phaseolina mitovirus 3                        | 100            | KX349057         |
| Rhizoctonia solani mitovirus 17 (RsMV-17)    | <i>Narnaviridae</i>     | (+)ssRNA   | 663                 | Heterobasidion mitovirus 1                                 | 100            | KX349059         |
| Rhizoctonia solani mitovirus 18 (RsMV-18)    | <i>Narnaviridae</i>     | (+)ssRNA   | 633                 | Macrophomina phaseolina mitovirus 2                        | 100            | KX349060         |
| Rhizoctonia solani mitovirus 19 (RsMV-19)    | <i>Narnaviridae</i>     | (+)ssRNA   | 675                 | Fusarium poae mitovirus 3                                  | 99             | KX349056         |
| Rhizoctonia solani mitovirus 20 (RsMV-20)    | <i>Narnaviridae</i>     | (+)ssRNA   | 978                 | Rhizoctonia solani dsRNA virus 1                           | 82             | KX349062         |
| Rhizoctonia solani mitovirus 21 (RsMV-21)    | <i>Narnaviridae</i>     | (+)ssRNA   | 4100                | Rhizoctonia solani mitovirus 13                            | 51.13          | MK372892         |
| Rhizoctonia solani mitovirus 22 (RsMV-22)    | <i>Narnaviridae</i>     | (+)ssRNA   | 2177                | dsRNA viral RdRp (mitochondrion) [Thanatephorus cucumeris] | 80.15          | MK490928         |
| Rhizoctonia solani mitovirus 23 (RsMV-23)    | <i>Narnaviridae</i>     | (+)ssRNA   | 2792                | Ceratobasidium mitovirus A                                 | 61.98          | MK375261         |
| Rhizoctonia solani mitovirus 24 (RsMV-24)    | <i>Narnaviridae</i>     | (+)ssRNA   | 2149                | Macrophomina phaseolina mitovirus 2                        | 85.48          | MK372893         |
| Rhizoctonia solani mitovirus 25 (RsMV-25)    | <i>Narnaviridae</i>     | (+)ssRNA   | 3767                | Macrophomina phaseolina mitovirus 3                        | 38.49          | MK372894         |
| Rhizoctonia solani mitovirus 26 (RsMV-26)    | <i>Narnaviridae</i>     | (+)ssRNA   | 2580                | Rhizoctonia cerealis mitovirus                             | 46.15          | MK372895         |

|                                               |                         |          |       |                                                            |       |          |
|-----------------------------------------------|-------------------------|----------|-------|------------------------------------------------------------|-------|----------|
| Rhizoctonia solani mitovirus 27 (RsMV-27)     | <i>Narnaviridae</i>     | (+)ssRNA | 3176  | Rhizoctonia cerealis mitovirus                             | 50.42 | MK372896 |
| Rhizoctonia solani mitovirus 28 (RsMV-28)     | <i>Narnaviridae</i>     | (+)ssRNA | 2640  | Rhizoctonia mitovirus 1                                    | 39.85 | MK372897 |
| Rhizoctonia solani mitovirus 29 (RsMV-29)     | <i>Narnaviridae</i>     | (+)ssRNA | 2904  | Binucleate Rhizoctonia mitovirus K1                        | 42.14 | MK372898 |
| Rhizoctonia solani mitovirus 30 (RsMV-30)     | <i>Narnaviridae</i>     | (+)ssRNA | 2760  | Binucleate Rhizoctonia mitovirus K1                        | 42.74 | MK372899 |
| Rhizoctonia solani mitovirus 31 (RsMV-31)     | <i>Narnaviridae</i>     | (+)ssRNA | 3820  | Rhizoctonia solani mitovirus 7                             | 52.80 | MK372900 |
| Rhizoctonia solani mitovirus 32 (RsMV-32)     | <i>Narnaviridae</i>     | (+)ssRNA | 3409  | Rhizoctonia solani mitovirus 7                             | 42.81 | MK372901 |
| Rhizoctonia solani mitovirus 33 (RsMV-33)     | <i>Narnaviridae</i>     | (+)ssRNA | 2733  | Rhizoctonia solani mitovirus 7                             | 37.97 | MK372902 |
| Rhizoctonia solani mitovirus 34 (RsMV-34)     | <i>Narnaviridae</i>     | (+)ssRNA | 3389  | Rhizoctonia solani mitovirus 11                            | 44.00 | MK372903 |
| Rhizoctonia solani mitovirus 35 (RsMV-35)     | <i>Narnaviridae</i>     | (+)ssRNA | 3772  | Rhizoctonia solani mitovirus 13                            | 43.70 | MK490929 |
| Rhizoctonia solani mitovirus 36 (RsMV-36)     | <i>Narnaviridae</i>     | (+)ssRNA | 2562  | Rhizoctonia solani mitovirus 13                            | 54.90 | MK490930 |
| Rhizoctonia solani mitovirus 37 (RsMV-37)     | <i>Narnaviridae</i>     | (+)ssRNA | 3597  | Rhizoctonia solani mitovirus 15                            | 5.106 | MK372904 |
| Rhizoctonia solani mitovirus 38 (RsMV-38)     | <i>Narnaviridae</i>     | (+)ssRNA | 3197  | dsRNA viral RdRp (mitochondrion) [Thanatephorus cucumeris] | 45.42 | MK372905 |
| ourmia-like virus 2 (RsOLV2)                  | <i>Botourmiaviridae</i> | (+)ssRNA | 4104  | Rhizoctonia solani ourmia-like virus 1 RNA 1               | 78.18 | MK372906 |
| ourmia-like virus 3 (RsOLV3)                  | <i>Botourmiaviridae</i> | (+)ssRNA | 3223  | Rhizoctonia solani ourmia-like virus 1 RNA 1               | 76.59 | MK372907 |
| ourmia-like virus 4 (RsOLV4)                  | <i>Botourmiaviridae</i> | (+)ssRNA | 4557  | Rhizoctonia solani ourmia-like virus 1 RNA 1               | 48.96 | MK372908 |
| ourmia-like virus 5 (RsOLV5)                  | <i>Botourmiaviridae</i> | (+)ssRNA | 5234  | Agaricus bisporus virus 15                                 | 25.89 | MK372909 |
| Rhizoctonia solani alphavirus-like 2 (RsALV2) | <i>Togaviridae</i>      | (+)ssRNA | 3396  | Rhizoctonia solani RNA virus 1                             | 69.38 | MK507792 |
| Rhizoctonia solani alphavirus-like 3 (RsALV3) | <i>Togaviridae</i>      | (+)ssRNA | 6752  | Rhizoctonia solani RNA virus 3                             | 83.12 | MK507786 |
| Rhizoctonia solani endornavirus 4 (RsEV4)     | <i>Endornaviridae</i>   | (+)ssRNA | 20215 | Endornavirus-like virus                                    | 35.16 | MK393902 |
| Rhizoctonia solani endornavirus 5 (RsEV5)     | <i>Endornaviridae</i>   | (+)ssRNA | 16227 | Rhizoctonia cerealis alphaendornavirus 1                   | 47.31 | MK393903 |
| Rhizoctonia solani endornavirus 6 (RsEV6)     | <i>Endornaviridae</i>   | (+)ssRNA | 15273 | Morchella importuna endornavirus 2                         | 45.18 | MK393904 |
| Rhizoctonia solani endornavirus 7             | <i>Endornaviridae</i>   | (+)ssRNA | 14473 | Rhizoctonia solani endornavirus 2                          | 30.69 | MK393905 |

|                                                 |                         |          |       |                                              |       |          |
|-------------------------------------------------|-------------------------|----------|-------|----------------------------------------------|-------|----------|
| (RsEV7)                                         |                         |          |       |                                              |       |          |
| Rhizoctonia solani partitivirus 6 (RsPV6)       | <i>Partitiviridae</i>   | dsRNA    | 2401  | Fusarium poae partitivirus 2                 | 50.96 | MK507781 |
| Rhizoctonia solani partitivirus 7 (RsPV7)       | <i>Partitiviridae</i>   | dsRNA    | 2310  | Rosellinia necatrix partitivirus 8           | 58.08 | MK507782 |
| Rhizoctonia solani partitivirus 8 (RsPV8)       | <i>Partitiviridae</i>   | dsRNA    | 1912  | Trichoderma atroviride partitivirus 1        | 68.08 | MK507783 |
| Rhizoctonia solani dsRNA virus 6 (RsdsRNA6)     | <i>Megabirnaviridae</i> | dsRNA    | 1867  | Trichoderma atroviride partitivirus 1        | 31.69 | MK507784 |
| Rhizoctonia solani dsRNA virus 7 (RsdsRNA7)     | <i>Megabirnaviridae</i> | dsRNA    | 1958  | Rhizoctonia oryzae-sativae partitivirus 1    | 53.19 | MK532273 |
| Rhizoctonia solani dsRNA virus 8 (RsdsRNA8)     | <i>Megabirnaviridae</i> | dsRNA    | 778   | Heterobasidion partitivirus 20               | 42.35 | MK532274 |
| Rhizoctonia solani dsRNA virus 9 (RsdsRNA9)     | <i>Megabirnaviridae</i> | dsRNA    | 11847 | Rhizoctonia fumigata mycovirus               | 30.95 | MK507788 |
| Rhizoctonia solani dsRNA virus 10 (RsdsRNA10)   | <i>Megabirnaviridae</i> | dsRNA    | 3523  | Rhizoctonia fumigata mycovirus               | 31.70 | MK507789 |
| Rhizoctonia solani ourmia-like virus 2 (RsOLV2) | <i>Botourmiaviridae</i> | (+)ssRNA | 2905  | Rhizoctonia fumigata mycovirus               | 30.83 | MK507790 |
| Rhizoctonia solani ourmia-like virus 3 (RsOLV3) | <i>Botourmiaviridae</i> | (+)ssRNA | 2162  | Rhizoctonia fumigata mycovirus               | 35.48 | MK507791 |
| Rhizoctonia solani ourmia-like virus 4 (RsOLV4) | <i>Botourmiaviridae</i> | (+)ssRNA | 9416  | Sclerotium rolfsii mycovirus dsRNA 1         | 37.37 | MK532272 |
| Rhizoctonia solani ourmia-like virus 5 (RsOLV5) | <i>Botourmiaviridae</i> | (+)ssRNA | 4104  | Rhizoctonia solani ourmia-like virus 1 RNA 1 | 78.18 | MK372906 |
| Rhizoctonia solani fusarivirus 2 (RsFV2)        | Unclassified            | Unknown  | 3223  | Rhizoctonia solani ourmia-like virus 1 RNA 1 | 76.59 | MK372907 |
| Rhizoctonia solani fusarivirus 3 (RsFV3)        | Unclassified            | Unknown  | 4557  | Rhizoctonia solani ourmia-like virus 1 RNA 1 | 48.96 | MK372909 |
| Rhizoctonia solani hypovirus 2 (RsFV2)          | <i>Hypoviridae</i>      | (+)ssRNA | 5234  | Agaricus bisporus virus 15                   | 25.89 | MK372908 |
| Rhizoctonia solani hypovirus 3 (RsFV3)          | <i>Hypoviridae</i>      | (+)ssRNA | 5518  | Agaricus bisporus virus 2                    | 28.49 | MK558255 |
| Rhizoctonia solani putative virus 2 (RsPuV2)    | Unclassified            | Unknown  | 10710 | Rosellinia necatrix fusarivirus 2            | 40.57 | MK558256 |
| Rhizoctonia solani putative virus 3 (RsPuV3)    | Unclassified            | Unknown  | 5959  | Fusarium graminearum dsRNA mycovirus-1       | 38.09 | MK558258 |
| Rhizoctonia solani putative virus 4 (RsPuV4)    | Unclassified            | Unknown  | 7137  | Sclerotium rolfsii hypovirus 1               | 27.16 | MK558260 |
|                                                 |                         |          | 7214  | Agaricus bisporus virus 2                    | 28.49 | MK558255 |
|                                                 |                         |          | 7833  | Sanxia atyid shrimp virus 1                  | 22.73 | MK507785 |
|                                                 |                         |          |       | Guarapuava tymovirus-like 1                  | 31.91 | MK532275 |
|                                                 |                         |          |       | Gayfeather mild mottle virus                 | 25.28 | MK507793 |
